# Supplementary material
Source: Springer Nature journal article supplement (https://www.springermedizin.de/resource/supplementary/12968_2009_501_MOESM3_ESM.pdf/9579122)

**Aortic Root Diameter (mm)**

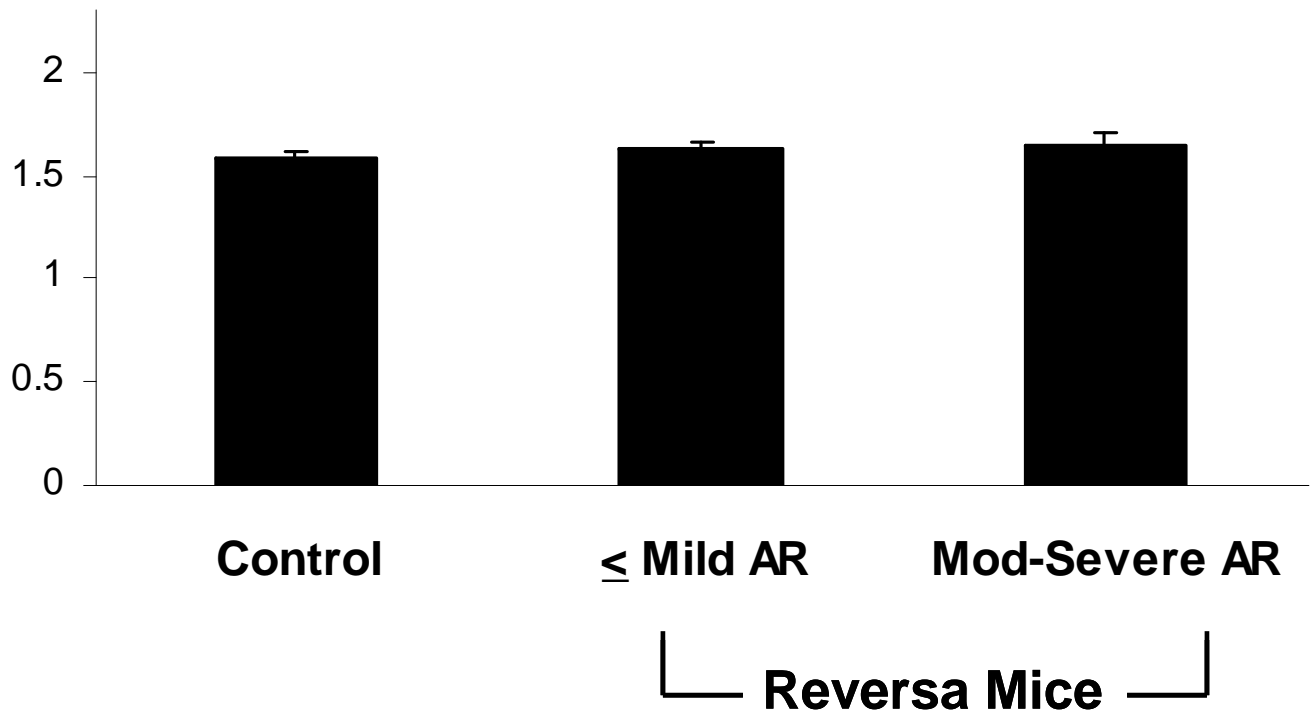

Supplement: MOESM3 [file 9579122]
